# Supplementary material for: Modulation of Food Intake by Differential TAS2R Stimulation in Rat
Source: Nutrients. 2020 Dec 10;12(12):3784. doi: 10.3390/nu12123784 (PMC7762996; doi:10.3390/nu12123784)
Supplement: Supplementary file 1 [file nutrients-12-03784-s001.pdf]

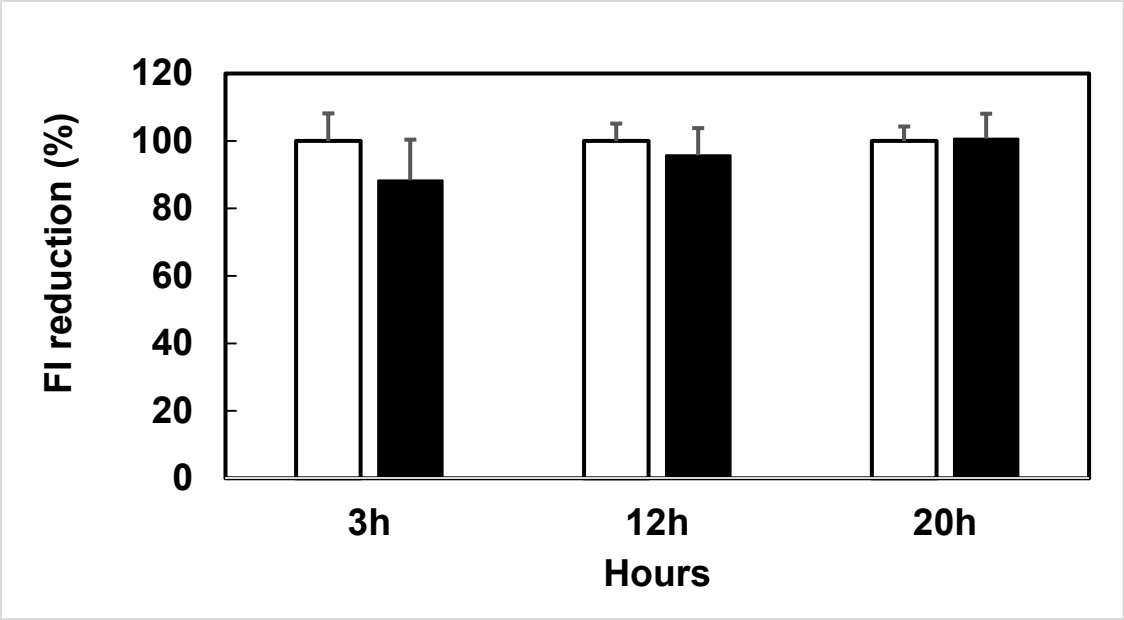

**Figure s1. Food intake after an acute dose of procyanidin B2 in female rats.** Animals were treated one hour before dark period with an acute dose of procyanidin B2, 62 mg/kg~ 0.11 mM (black columns) or tap water as vehicle (white columns). Food intake was measured at the times indicated since dark period starts.

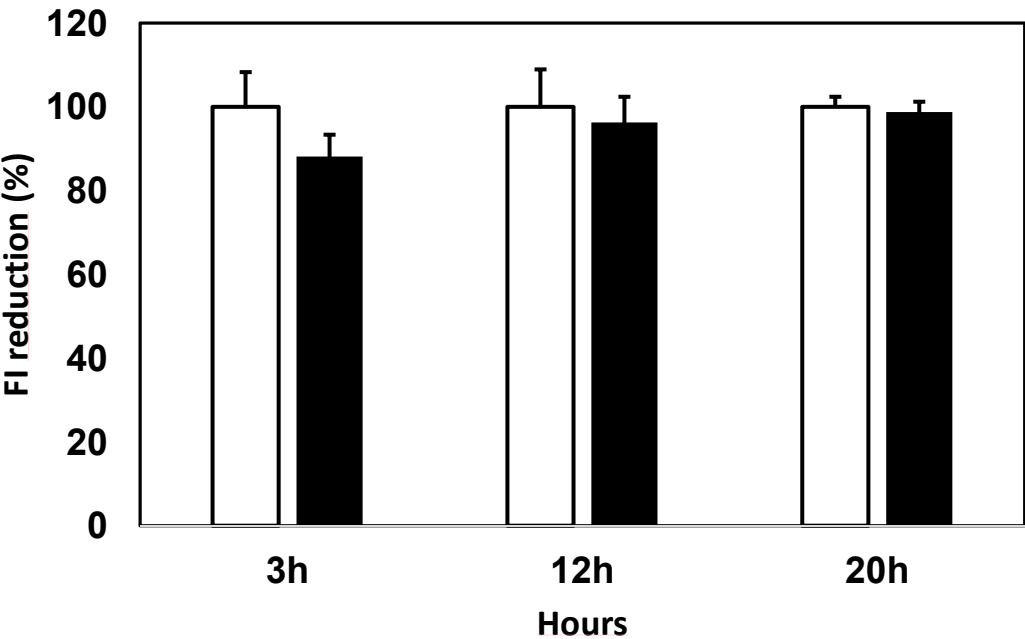

**Figure s2. Food intake after an acute dose of Thiamine in female rats.** Animals were treated one hour before dark period with an acute dose of Thiamine 2 g/kg~ 7.5 mM (black columns) or tap water as vehicle (white columns). Food intake was measured at the times indicated since dark period starts.

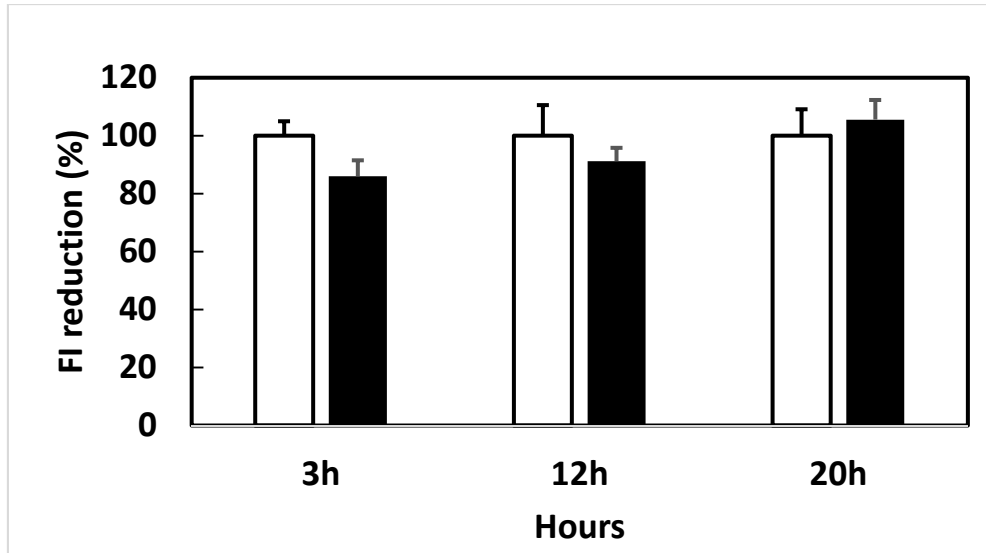

**Figure s3. Food intake after an acute dose of Epicatechin gallate in female rats.** Animals were treated one hour before dark period with an acute dose of Epicatechin gallate (14 mg/kg ~0.031 mM) (black columns) or tap water as vehicle (white columns). Food intake was measured at the times indicated since dark period starts.

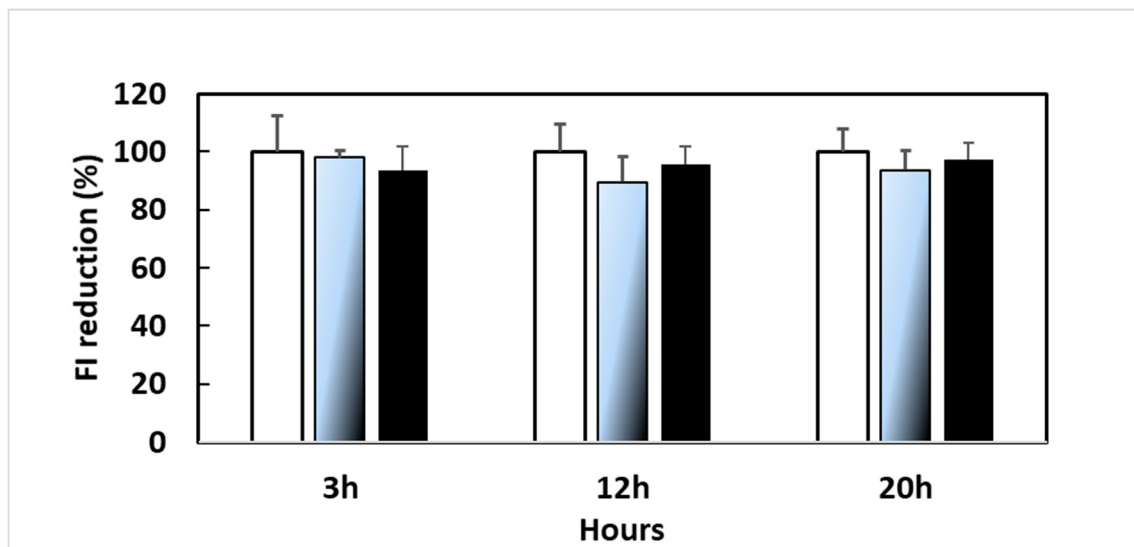

**Figure S4. Food intake after an acute dose of Epicatechin + EGCG in female rats.** Animals were treated one hour before dark period with an acute dose of Epicatechin 100 mg/kg + EGCG 10 mg/kg (grey columns). Or Epicatechin 200 mg/kg + EGCG 20 mg/kg (black columns). Food intake was measured at the times indicated since dark period starts.

**Table S1.** Compounds tested for secretion in intestinal segments and food intake studies and their concentration.

| Compound                               | Concentration                |
|----------------------------------------|------------------------------|
| Tested in intestinal segments          |                              |
| 1,10-Phenanthroline                    | 150 $\mu$ M                  |
| Thiamine                               | 1 mM                         |
| 1,10-Phenanthroline + Thiamine         | 150 $\mu$ M+1mM              |
| Epicatechin                            | 1 mM                         |
| Procyanidin B2 (B2)                    | 67 or 300 $\mu$ M            |
| Epicatechin + B2                       | 1 mM + 300 $\mu$ M           |
| Procyanidin B2 gallate                 | 20 $\mu$ M                   |
| Flufenamic acid                        | 50 $\mu$ M                   |
| Protocatechuic acid                    | 300 $\mu$ M                  |
| Vanillic acid                          | 300 $\mu$ M                  |
| Tested for food intake                 |                              |
| Epicatechin                            | 244 mg/kg or 300 mg/kg       |
| Procyanidin B2                         | 62 mg/kg                     |
| Epicatechin + B2                       | 213+62 mg/kg                 |
| Epicatechin + B2 + Epicatechin gallate | 200+62+18 mg/kg              |
| Vanillic acid                          | 252 mg/kg                    |
| Epicatechin + Vanillic acid            | 252+244 mg/kg                |
| Epicatechin + Epigallocatechin gallate | 100+10 mg/kg or 200+20 mg/kg |
| Epicatechin + Epicatechin gallate      | 234+14 mg/kg                 |

**Table S2.** Molarity of respective ligands of hTAS2R in GSPE and Cocoanox (mM).

|                                         | GSPE  | Cocoanox | Epicatechin + B2 + Epicatechin gallate |
|-----------------------------------------|-------|----------|----------------------------------------|
| Selective for hTAS2R5 (Trimer)          | 32.8  | -        | -                                      |
| hTAS2R5 and 39 (Epicatechin, B2g, EgCg) | 244.0 | 66.7     | 0.69                                   |
| Selective for hTAS2R39 (ECg)            | 125.0 | -        | 0.04                                   |
| Selective for hTAS2R14 (Vanillic, PCA)  | 7.1   | -        | -                                      |
| B2 (dimeric procyanidin)                | 249.3 | 29.1     | 0.11                                   |
